# Supplementary material for: A new threat to bees? Entomopathogenic nematodes used in biological pest control cause rapid mortality in Bombus terrestris
Source: PeerJ. 2015 Nov 19;3:e1413. doi: 10.7717/peerj.1413 (PMC4655097; doi:10.7717/peerj.1413)
Supplement: Data S1 — The file contains the raw data for bee mortality during exposure to entomopathogenic nematodes, as required by the journal. [file peerj-03-1413-s001.xlsx]

## Sheet: GYO survival
DAY	MORTALITY	TREATMENT
1	0	1	WEEK 1
1	0	1
1	0	1
1	0	1
1	0	1						TREATMENT	CONCENTRATION
1	0	2						1	Control
1	0	2						2	10/cm2
1	0	2						3	25/cm2
1	0	2						4	50/cm2
1	0	2
1	0	3
1	0	3						Death = 1
1	0	3
1	0	3
1	0	3
1	0	4
1	0	4
1	0	4
1	0	4
1	0	4
2	0	1
2	0	1
2	0	1
2	0	1
2	0	1
2	1	2
2	1	2
2	1	2
2	0	2
2	1	2
2	1	3
2	1	3
2	0	3
2	0	3
2	0	3
2	1	4
2	1	4
2	0	4
2	0	4
2	1	4
3	0	1
3	0	1
3	0	1
3	0	1
3	0	1
3	1	2
3	1	2
3	1	2
3	1	2
3	1	2
3	0	3
3	1	3
3	1	3
3	1	3
3	1	3
3	1	4
3	0	4
3	1	4
3	1	4
3	0	4
4	0	1
4	0	1
4	0	1
4	0	1
4	0	1
4	1	2
4	1	2
4	1	2
4	1	2
4	1	2
4	1	3
4	1	3
4	1	3
4	1	3
4	1	3
4	1	4
4	0	4
4	1	4
4	1	4
4	1	4
1	0	1	WEEK 2
1	0	1
1	0	1
1	0	1
1	0	1
1	0	2
1	0	2
1	0	2
1	0	2
1	0	2
1	0	3
1	0	3
1	0	3
1	0	3
1	0	3
1	0	4
1	0	4
1	0	4
1	0	4
1	0	4
2	0	1
2	0	1
2	0	1
2	0	1
2	0	1
2	0	2
2	0	2
2	0	2
2	0	2
2	1	2
2	0	3
2	0	3
2	0	3
2	0	3
2	1	3
2	0	4
2	0	4
2	0	4
2	0	4
2	0	4
3	0	1
3	0	1
3	0	1
3	0	1
3	0	1
3	1	2
3	1	2
3	0	2
3	0	2
3	1	2
3	0	3
3	0	3
3	0	3
3	1	3
3	1	3
3	1	4
3	1	4
3	1	4
3	1	4
3	0	4
4	0	1
4	0	1
4	0	1
4	0	1
4	0	1
4	1	2
4	1	2
4	1	2
4	1	2
4	1	2
4	1	3
4	1	3
4	1	3
4	1	3
4	1	3
4	1	4
4	1	4
4	1	4
4	1	4
4	1	4
1	0	1	WEEK 3
1	0	1
1	0	1
1	0	1
1	0	1
1	0	2
1	0	2
1	0	2
1	0	2
1	0	2
1	0	3
1	0	3
1	0	3
1	0	3
1	0	3
1	0	4
1	0	4
1	0	4
1	0	4
1	0	4
2	0	1
2	0	1
2	0	1
2	0	1
2	0	1
2	0	2
2	0	2
2	0	2
2	0	2
2	0	2
2	0	3
2	0	3
2	0	3
2	0	3
2	0	3
2	1	4
2	0	4
2	1	4
2	0	4
2	0	4
3	0	1
3	0	1
3	0	1
3	0	1
3	0	1
3	0	2
3	1	2
3	0	2
3	1	2
3	1	2
3	1	3
3	1	3
3	1	3
3	1	3
3	1	3
3	1	4
3	1	4
3	1	4
3	1	4
3	1	4
4	0	1
4	1	1
4	1	1
4	0	1
4	1	1
4	1	2
4	1	2
4	1	2
4	1	2
4	1	2
4	1	3
4	1	3
4	1	3
4	1	3
4	1	3
4	1	4
4	1	4
4	1	4
4	1	4
4	1	4
1	0	1	WEEK 4
1	0	1
1	0	1
1	0	1
1	0	1
1	0	2
1	0	2
1	0	2
1	0	2
1	0	2
1	0	3
1	0	3
1	0	3
1	0	3
1	0	3
1	0	4
1	0	4
1	0	4
1	0	4
1	0	4
2	0	1
2	0	1
2	0	1
2	0	1
2	0	1
2	1	2
2	0	2
2	0	2
2	0	2
2	1	2
2	0	3
2	0	3
2	1	3
2	0	3
2	0	3
2	0	4
2	0	4
2	0	4
2	0	4
2	0	4
3	0	1
3	0	1
3	0	1
3	0	1
3	0	1
3	1	2
3	0	2
3	0	2
3	0	2
3	1	2
3	0	3
3	0	3
3	1	3
3	0	3
3	0	3
3	0	4
3	0	4
3	0	4
3	0	4
3	0	4
4	0	1
4	0	1
4	0	1
4	0	1
4	0	1
4	1	2
4	0	2
4	1	2
4	1	2
4	1	2
4	1	3
4	0	3
4	1	3
4	0	3
4	0	3
4	1	4
4	1	4
4	0	4
4	1	4
4	0	4
1	0	1	WEEK 5
1	0	1
1	0	1
1	0	1
1	0	1
1	0	2
1	0	2
1	0	2
1	0	2
1	0	2
1	0	3
1	0	3
1	0	3
1	0	3
1	0	3
1	0	4
1	0	4
1	0	4
1	0	4
1	0	4
2	0	1
2	0	1
2	0	1
2	0	1
2	0	1
2	0	2
2	0	2
2	0	2
2	0	2
2	0	2
2	0	3
2	0	3
2	0	3
2	0	3
2	0	3
2	0	4
2	0	4
2	0	4
2	0	4
2	0	4
3	0	1
3	0	1
3	0	1
3	0	1
3	0	1
3	1	2
3	1	2
3	1	2
3	0	2
3	1	2
3	1	3
3	1	3
3	1	3
3	1	3
3	1	3
3	1	4
3	1	4
3	0	4
3	1	4
3	1	4
4	0	1
4	0	1
4	0	1
4	0	1
4	0	1
4	1	2
4	1	2
4	1	2
4	1	2
4	1	2
4	1	3
4	1	3
4	1	3
4	1	3
4	1	3
4	1	4
4	1	4
4	1	4
4	1	4
4	1	4

## Sheet: VW survival
DAY	MORTALITY	TREATMENT
1	0	1	WEEK 1
1	0	1
1	0	1
1	0	1
1	0	1						TREATMENT	CONCENTRATION
1	0	2						1	Control
1	0	2						2	10/cm2
1	0	2						3	25/cm2
1	1	2						4	50/cm2
1	0	2
1	0	3
1	0	3						Death = 1
1	1	3
1	0	3
1	0	3
1	0	4
1	1	4
1	0	4
1	1	4
1	1	4
2	0	1
2	0	1
2	0	1
2	0	1
2	0	1
2	0	2
2	0	2
2	0	2
2	1	2
2	0	2
2	0	3
2	0	3
2	1	3
2	0	3
2	0	3
2	1	4
2	1	4
2	0	4
2	1	4
2	1	4
3	0	1
3	0	1
3	0	1
3	0	1
3	0	1
3	0	2
3	0	2
3	0	2
3	1	2
3	0	2
3	0	3
3	0	3
3	1	3
3	1	3
3	0	3
3	1	4
3	1	4
3	1	4
3	1	4
3	1	4
4	0	1
4	0	1
4	0	1
4	0	1
4	0	1
4	0	2
4	0	2
4	0	2
4	1	2
4	0	2
4	1	3
4	0	3
4	1	3
4	1	3
4	0	3
4	1	4
4	1	4
4	1	4
4	1	4
4	1	4
1	0	1	WEEK 2
1	0	1
1	0	1
1	0	1
1	0	1
1	0	2
1	0	2
1	0	2
1	1	2
1	0	2
1	1	3
1	1	3
1	0	3
1	0	3
1	0	3
1	1	4
1	0	4
1	0	4
1	1	4
1	1	4
2	0	1
2	0	1
2	0	1
2	1	1
2	0	1
2	1	2
2	1	2
2	0	2
2	1	2
2	0	2
2	1	3
2	1	3
2	1	3
2	0	3
2	0	3
2	1	4
2	0	4
2	1	4
2	1	4
2	1	4
3	0	1
3	0	1
3	0	1
3	1	1
3	0	1
3	1	2
3	1	2
3	1	2
3	1	2
3	1	2
3	1	3
3	1	3
3	1	3
3	0	3
3	1	3
3	1	4
3	1	4
3	1	4
3	1	4
3	1	4
4	0	1
4	0	1
4	0	1
4	1	1
4	0	1
4	1	2
4	1	2
4	1	2
4	1	2
4	1	2
4	1	3
4	1	3
4	1	3
4	0	3
4	1	3
4	1	4
4	1	4
4	1	4
4	1	4
4	1	4
1	0	1	WEEK 3
1	0	1
1	0	1
1	0	1
1	0	1
1	0	2
1	0	2
1	0	2
1	0	2
1	0	2
1	0	3
1	0	3
1	1	3
1	0	3
1	0	3
1	0	4
1	0	4
1	0	4
1	0	4
1	0	4
2	0	1
2	0	1
2	0	1
2	0	1
2	0	1
2	0	2
2	1	2
2	0	2
2	0	2
2	1	2
2	0	3
2	0	3
2	1	3
2	0	3
2	0	3
2	1	4
2	1	4
2	1	4
2	1	4
2	1	4
3	0	1
3	0	1
3	1	1
3	1	1
3	0	1
3	1	2
3	1	2
3	1	2
3	0	2
3	1	2
3	1	3
3	1	3
3	1	3
3	0	3
3	1	3
3	1	4
3	1	4
3	1	4
3	1	4
3	1	4
4	0	1
4	1	1
4	1	1
4	1	1
4	1	1
4	1	2
4	1	2
4	1	2
4	0	2
4	1	2
4	1	3
4	1	3
4	1	3
4	1	3
4	1	3
4	1	4
4	1	4
4	1	4
4	1	4
4	1	4
1	0	1	WEEK 4
1	0	1
1	0	1
1	0	1
1	0	1
1	0	2
1	0	2
1	0	2
1	0	2
1	0	2
1	0	3
1	0	3
1	0	3
1	0	3
1	0	3
1	0	4
1	0	4
1	0	4
1	0	4
1	0	4
2	0	1
2	0	1
2	0	1
2	0	1
2	0	1
2	0	2
2	0	2
2	0	2
2	0	2
2	0	2
2	0	3
2	0	3
2	0	3
2	0	3
2	0	3
2	0	4
2	0	4
2	0	4
2	0	4
2	0	4
3	0	1
3	0	1
3	0	1
3	0	1
3	0	1
3	0	2
3	0	2
3	0	2
3	0	2
3	0	2
3	1	3
3	1	3
3	0	3
3	0	3
3	0	3
3	0	4
3	0	4
3	0	4
3	0	4
3	0	4
4	0	1
4	0	1
4	0	1
4	0	1
4	0	1
4	0	2
4	1	2
4	0	2
4	1	2
4	0	2
4	1	3
4	1	3
4	0	3
4	0	3
4	0	3
4	0	4
4	0	4
4	0	4
4	1	4
4	1	4
1	0	1	WEEK 5
1	0	1
1	0	1
1	0	1
1	0	1
1	0	2
1	0	2
1	0	2
1	0	2
1	0	2
1	0	3
1	0	3
1	1	3
1	0	3
1	0	3
1	0	4
1	0	4
1	1	4
1	0	4
1	0	4
2	0	1
2	0	1
2	0	1
2	0	1
2	0	1
2	0	2
2	0	2
2	0	2
2	0	2
2	0	2
2	0	3
2	1	3
2	1	3
2	0	3
2	1	3
2	1	4
2	0	4
2	1	4
2	0	4
2	0	4
3	0	1
3	0	1
3	0	1
3	0	1
3	0	1
3	0	2
3	0	2
3	0	2
3	1	2
3	0	2
3	0	3
3	1	3
3	1	3
3	1	3
3	1	3
3	1	4
3	1	4
3	1	4
3	0	4
3	0	4
4	0	1
4	0	1
4	0	1
4	0	1
4	0	1
4	1	2
4	0	2
4	0	2
4	1	2
4	0	2
4	0	3
4	1	3
4	1	3
4	1	3
4	1	3
4	1	4
4	1	4
4	1	4
4	0	4
4	0	4

## Sheet: NEMATODE REPLICATION
TREATMENT	per 20ul	vol liquid (ml)	total nem recovered
1	0	N/A	0
1	0	N/A	0
1	0	N/A	0
1	0	N/A	0			Treatment	Average Nematodes recovered
1	0	N/A	0			1		0						TREATMENT	CONCENTRATION
1	0	N/A	0			2	10075							1	Control
1	0	N/A	0			3	8065.62							2	10/cm2
1	0	N/A	0			4	11576.7							3	25/cm2
1	0	N/A	0											4	50/cm2
1	0	N/A	0
2	25	15	18750
2	62	2	6200
2	19	13	12350
2	25	10	12500
2	12	10	6000
2	22	10	11000
2	39	1	1950
2	27	6	8100
2	19	9	8550
2	80	4	16000
2	17	11	9350
2	29	7	10150
3	49	3	7350
3	12	10	6000
3	22	10	11000
3	36	4	7200
3	25	10	12500
3	54	1	2700
3	31	5	7750
3	19	10	9500
3	27	6	8100
3	25	4	5000
3	30	4	6000
3	41	5	10250
3	11	13	7150
3	21	9	9450
3	16	7	5600
3	42	3	6300
3	12	12	7200
4	43	3	6450
4	26	5	6500
4	45	6	13500
4	12	14	8400
4	69	2	6900
4	77	15	57750
4	26	6	7800
4	12	8	4800
4	55	3	8250
4	18	11	9900
4	22	7	7700
4	32	5	8000
4	13	11	7150
4	19	9	8550
4	8	14	5600
4	16	8	6400
